# Supplementary material for: Production, Characterization and Application of a Novel Chitosanase from Marine Bacterium Bacillus paramycoides BP-N07
Source: MDPI journal article supplement (doi:10.3390/foods12183350), 2023-09-07
Supplement: s1 [file s1]

## Supplementary Table S1:

**Table S1.** Comparison of properties of purified chitosanases produced by bacteria.

| Organism                                  | MW (kDa) | Optimum pH | Optimum temperature (°C) | Composition of products | References |
|-------------------------------------------|----------|------------|--------------------------|-------------------------|------------|
| <i>Bacillus licheniformis</i> NBL420      | 45       | 8          | 50                       | /                       | [1]        |
| <i>Bacillus mojavensis</i> SY1            | 31       | 5.5        | 55                       | DP2-4                   | [2]        |
| <i>Bacillus atrophaeus</i> BSS            | 27       | 5          | 45                       | DP2-4                   | [3]        |
| <i>Bacillus glycinifermentans</i> BT2019  | 32       | 5          | 20                       | DP2-5                   | [4]        |
| <i>Bacillus amyloliquefaciens</i>         | 29       | 6.5        | 55                       | DP2-3                   | [5]        |
| <i>Bacillus amyloliquefaciens</i>         | 29       | 5.6        | 40                       | DP2-3                   | [6]        |
| <i>Bacillus subtilis</i> HD145            | 31       | 5.5        | 50                       | DP2-4                   | [7]        |
| <i>Bacillus sp.</i> MD-5                  |          |            |                          |                         |            |
| <i>Bacillus sp.</i> DAU101                | 35       | 7.0        | 40                       | DP2-3                   | [8]        |
| <i>Aspergillus fumigatus</i> CJ22-326     | 27       | 7.5        | 50                       | DP2-4                   | [9]        |
|                                           | 23.5     | 5.0-6.0    | 55-65                    | DP2-6                   | [10]       |
| <i>Streptomyces albolongus</i> ATCC 27414 | 29.6     | 8.0        | 50                       | DP1-2                   | [11]       |
| <i>Amycolatopsis orientalis</i> IFO12806  | 104      | 5.3        | 60                       | /                       | [12]       |

1. PYO, H. I.;JANG, H. K.;LEE, S. Y. and CHOI, S. G. Cloning and characterization of a bifunctional cellulase-chitosanase gene from *Bacillus Licheniformis* NBL420. *Journal of Microbiology and Biotechnology* **2003**, *13*, 35-42.
2. Wang, J.;Li, X.;Chen, H.;Lin, B. and Zhao, L. Heterologous expression and characterization of a high-efficiency chitosanase from *Bacillus Mojavensis* SY1 suitable for production of chitosan oligosaccharides. *Frontiers in microbiology* **2021**, *12*, 781138.
3. Cui, D.;Yang, J.;Lu, B. and Shen, H. Efficient preparation of chitoooligosaccharide with a potential chitosanase Csn-Sh and its application for fungi disease protection. *Frontiers in microbiology* **2021**, *12*, 682829.

4. Peng, Y.; Wang, Y.; Liu, X.; Zhou, R.; Liao, X.; Min, Y.; Ma, L.; Wang, Y. and Rao, B. Expression and surface display of an acidic cold-active chitosanase in *Pichia Pastoris* using multi-copy expression and high-density cultivation. *Molecules (Basel, Switzerland)* **2022**, *27*, 800.
5. Luo, S.; Qin, Z.; Chen, Q.; Fan, L.; Jiang, L. and Zhao, L. High level production of a *Bacillus Amyloliquefaciens* chitosanase in *Pichia Pastoris* Suitable for Chitooligosaccharides Preparation. *International journal of biological macromolecules* **2020**, *149*, 1034-1041.
6. Bhuvanachandra, B.; Sivaramakrishna, D.; Alim, S.; Preethiba, G.; Rambabu, S.; Swamy, M. J. and Podile, A. R. New class of chitosanase from *Bacillus Amyloliquefaciens* for the generation of chitooligosaccharides. *Journal of agricultural and food chemistry* **2021**, *69*, 78-87.
7. Kang, L. X.; Chen, X. M.; Fu, L. and Ma, L. X. Recombinant expression of chitosanase from *Bacillus Subtilis* Hd145 in *Pichia Pastoris*. *Carbohydrate research* **2012**, *352*, 37-43.
8. Yang, G.; Sun, H.; Cao, R.; Liu, Q. and Mao, X. Characterization of a novel glycoside hydrolase family 46 chitosanase, Csn-Bac, from *Bacillus* Sp. MD-5. *International journal of biological macromolecules* **2020**, *146*, 518-523.
9. Lee, Y. S.; Yoo, J. S.; Chung, S. Y.; Lee, Y. C.; Cho, Y. S. and Choi, Y. L. Cloning, purification, and characterization of chitosanase from *Bacillus* Sp. DAU101. *Applied microbiology and biotechnology* **2006**, *73*, 113-121.
10. Zhou, J.; Liu, X.; Yuan, F.; Deng, B. and Yu, X. Biocatalysis of heterogenously-expressed chitosanase for the preparation of desirable chitosan oligosaccharides applied against phytopathogeni fungi. *Acs Sustainable Chemistry & Engineering*. **2020**, *8*, 4781–4791.
11. Guo, N.; Sun, J.; Wang, W.; Gao, L.; Liu, J.; Liu, Z.; Xue, C. and Mao, X. Cloning, Expression and Characterization of a Novel Chitosanase from *Streptomyces Albolongus* Atcc 27414. *Food chemistry* **2019**, *286*, 696-702.
12. Cote, N.; Fleury, A.; Dumont-Blanchette, E.; Fukamizo, T.; Mitsutomi, M.; Brzezinski, R. Two exo-beta-D-glucosaminidases/exochitosanases from actinomycetes define a new subfamily within family 2 of glycoside hydrolases. *Biochem. J.* **2006**, *394*, 675-686.

**Supplementary Figure S1:**

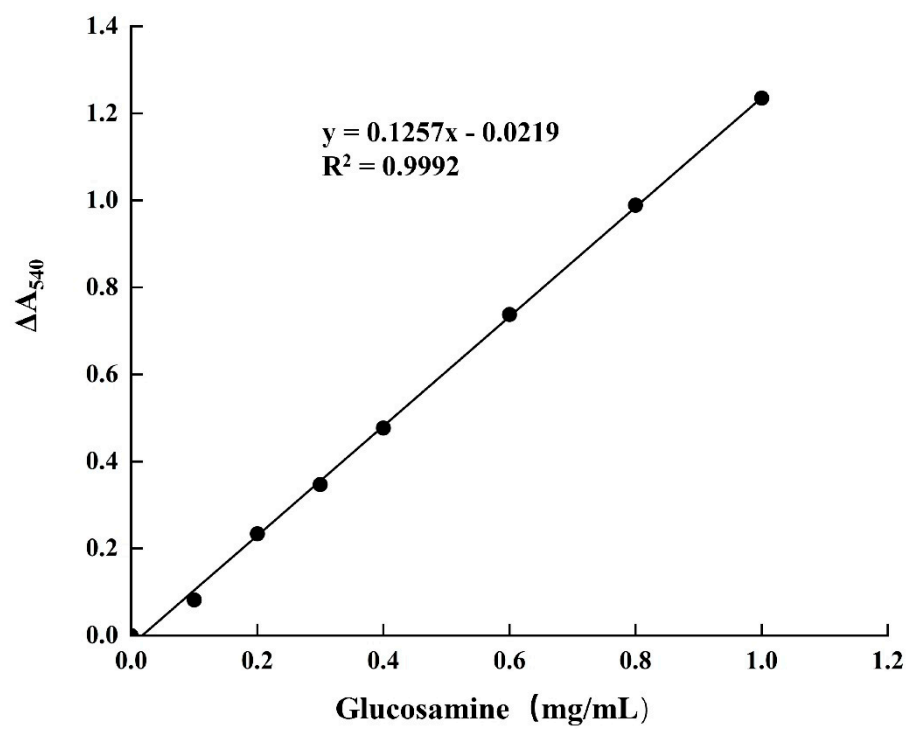

**Figure S1.** The standard curve of glucosamine (0.1-1.0 mg/mL) for the determination of chitosanase activity.

**Supplementary Figure S2:**

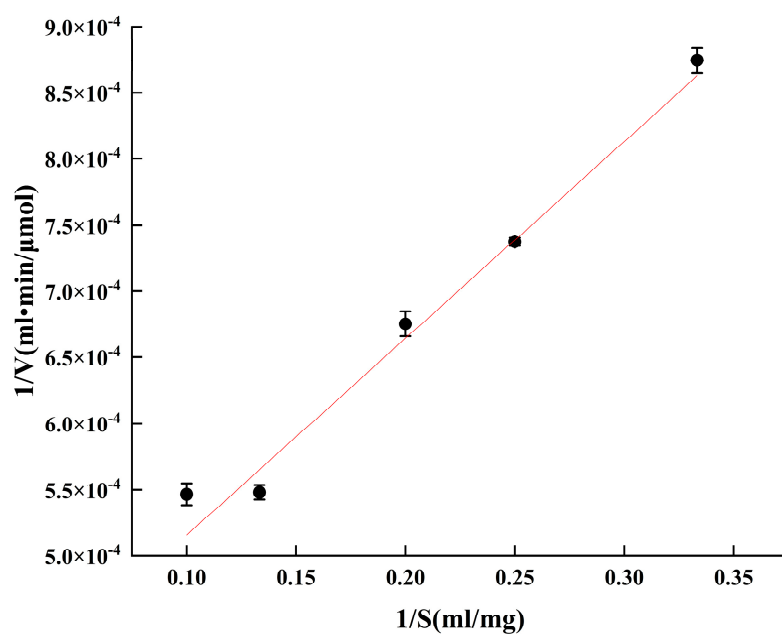

**Figure S2.** The curve of Lineweaver-Burk. The effects of the chitosan concentration on *BpCSN* activity. The letters “a,b,c,d” are subsets by Duncan algorithm. The same letters indicate insignificant difference ( $P > 0.05$ ), the different letters indicate significant difference ( $P < 0.05$ ).

**Supplementary Figure S3:**

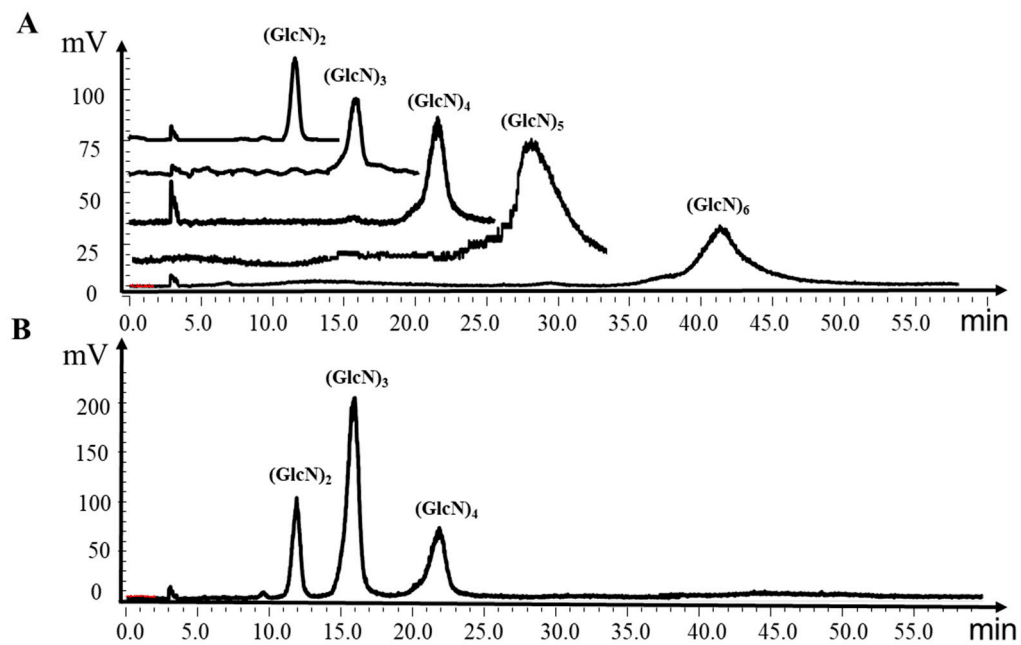

**Figure S3.** High-performance liquid chromatography (HPLC) analysis of hydrolytic products. A: COSs standard chromatogram diagram. B: HPLC analysis of final products hydrolyzed by *Bp*CSN.

**Supplementary Figure S4:**

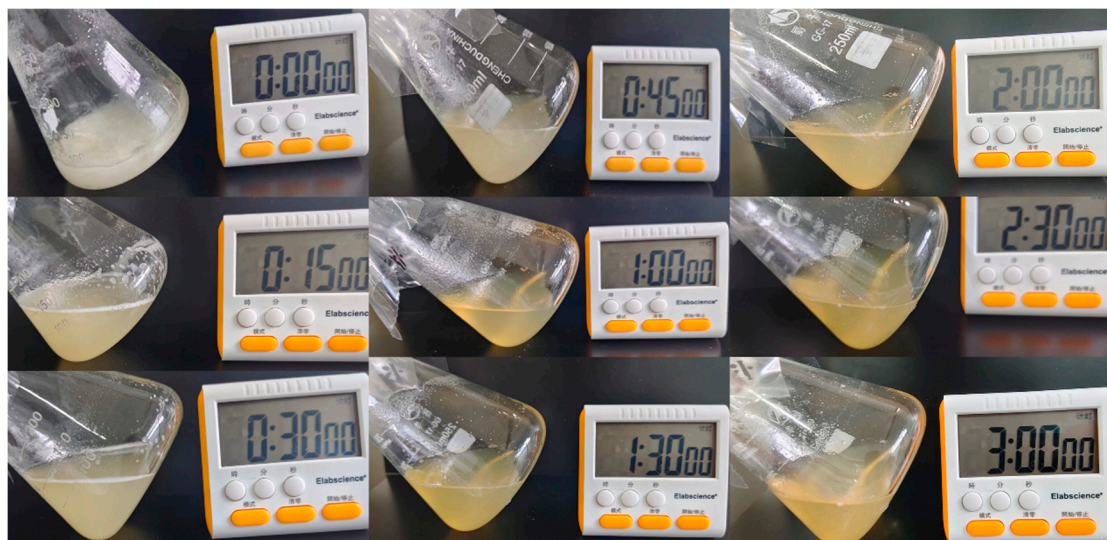

**Figure S4.** *BpCSN* was used for a preparation of oligosaccharides.

**Supplementary informations:**

The 16S rDNA sequences of *Bacillus paramycoides* BP-N07.

>OQ930621.1

CATTGGGGCAGCATAATGCAGTCGAGCGAATGGATTAAGAGCTTGCTCTTATGAAGTTA  
GCGGCGGACGGGTGAGTAACACGTGGGTAACTGCCATAAGACTGGGATAACTCCG  
GGAAACCGGGGCTAATACCGGATAACATTTGAACCGCATGGTTCGAAATTGAAAGGC  
GGCTTCGGCTGTCATTATGGATGGACCCGCGTCGCATTAGCTAGTTGGTGAGGTAACG  
GCTCACCAAGGCAACGATGCGTAGCCGACCTGAGAGGGTGATCGGCCACACTGGGAC  
TGAGACACGGCCCAGACTCCTACGGGAGGCAGCAGTAGGGAATCTTCCGCAATGGAC  
GAAAGTCTGACGGAGCAACGCCGCGTGAGTGATGAAGGCTTTCGGGTCGTAAAACTC  
TGTTGTTAGGGAAGAACAAGTGCTAGTTGAATAAGCTGGCACCTTGACGGTACCTAAC  
CAGAAAGCCACGGCTAACTACGTGCCAGCAGCCGCGGTAATACGTAGGTGGCAAGCG  
TTATCCGGAATTATTGGGCGTAAAGCGCGCGCAGGTGGTTTCTTAAGTCTGATGTGAAA  
GCCACGGCTCAACCGTGGAGGGTCATTGGAACTGGGAGACTTGAGTGCAGAAGAG  
GAAAGTGGAATTCCATGTGTAGCGGTGAAATGCGTAGAGATATGGAGGAACACCAGTG  
GCGAAGGCGACTTTCTGGTCTGTAAGTACACTGAGGCGCGAAAGCGTGGGGAGCAA  
ACAGGATTAGATACCCTGGTAGTCCACGCCGTAAACGATGAGTGCTAAGTGTTAGAGG  
GTTTCCGCCCTTTAGTGCTGAAGTTAACGCATTAAGCACTCCGCCTGGGGAGTACGGC  
CGCAAGGCTGAACTCAAAGGAATTGACGGGGGCGCACAAGCGGTGGAGCATGTG  
GTTTAATTGAAGCAACGCGAAGAACCTTACCAGGTCTTGACATCCTCTGACAACCCT  
AGAGATAGGGCTTCTCCTTCGGGAGCAGAGTGACAGGTGGTGCATGGTTGTCGTCAGC  
TCGTGTCGTGAGATGTTGGGTAAAGTCCCGCAACGAGCGCAACCCTTGATCTTAGTTG  
CCATCATTAAAGTTGGGCACTCTAAGGTGACTGCCGGTGACAAACCGGAGGAAGGTGG  
GGATGACGTCAAATCATCATGCCCCTTATGACCTGGGCTACACACGTGCTACAATGGAC  
GGTACAAAGAGCTGCAAGACCGCGAGGTGGAGCTAATCTCATAAAACCGTTCTCAGTT  
CGGATTGTAGGCTGCAACTCGCCTACATGAAGCTGGAATCGCTAGTAATCGCGGATCAG  
CATGCCGCGGTGAATACGTTCCCGGGCCTTGTAACACCGCCCGTCACACCACGAGAG  
TTTGTAACACCCGAAGTCGGTGGGGTAACCTTTTGGAACCCGCCGGCTAAGGGGGGA  
ACGAAGAATGGGGTGAATCTACAAGGGGTGTCCGCATAAACCC
